1 **The combined treatment of Molnupiravir and Favipiravir results in a marked potentiation of efficacy**  
2 **in a SARS-CoV2 hamster infection model through an increased frequency of mutations in the viral**  
3 **genome.**

4 Rana Abdelnabi<sup>1#\*</sup>, Caroline S. Foo<sup>1#</sup>, Suzanne J. F. Kaptein<sup>1</sup>, Xin Zhang<sup>1</sup>, Lana Langendries<sup>1</sup>, Laura  
5 Vangeel<sup>1</sup>, Judith Breuer<sup>2</sup>, Juanita Pang<sup>2</sup>, Rachel Williams<sup>2</sup>, Valentijn Vergote<sup>1</sup>, Elisabeth Heylen<sup>1</sup>, Pieter  
6 Leysen<sup>1</sup>, Kai Dallmeier<sup>1</sup>, Lotte Coelmont<sup>1</sup>, Dirk Jochmans<sup>1</sup>, Arnab K. Chatterjee<sup>3</sup>, Steven De Jonghe<sup>1</sup>,  
7 Birgit Weynand<sup>4</sup>, Johan Neyts<sup>1,5\*</sup>.

8 1. KU Leuven Department of Microbiology, Immunology and Transplantation, Rega Institute for  
9 Medical Research, Laboratory of Virology and Chemotherapy, B-3000 Leuven, Belgium.

10 2. UCL Institute of Child Health, 30 Guilford Street, London, WC1N 1EH, United Kingdom.

11 3. Calibr at Scripps Research, La Jolla, CA, USA.

12 4. KU Leuven Department of Imaging and Pathology, Translational Cell and Tissue Research, B-3000  
13 Leuven, Belgium; Division of Translational Cell and Tissue Research.

14 5. Global Virus Network

15 **#R.A. and C.S.F. contributed equally to this work**

16 \*To whom correspondence may be addressed. Email: [rana.abdelnabi@kuleuven.be](mailto:rana.abdelnabi@kuleuven.be) and  
17 [johan.neyts@kuleuven.be](mailto:johan.neyts@kuleuven.be).

18 **Author Contributions**

19 R.A., C.S.F. and J.N. designed the studies; R.A., C.S.F., S.J.F.K., X.Z., J.B., J.P. and L.L. performed the  
20 studies ; R.A., C.S.F., J.B, J.P. and B.W. analyzed data; D.J. and J.N. provided advice on the interpretation  
21 of data; R.A., C.S.F. and J.N. wrote the paper with input from co-authors; A.K.C. and S.D.J provided  
22 essential reagents; V.G. and E.H. provided and facilitated access to essential infrastructure; R.A., C.S.F.,  
23 R.W. and J.N. supervised the study; L.V., L.C., P.L., J.N. and K.D. acquired funding.

24

25 **Abstract**

26 The experimental anti-influenza drug Molnupiravir, an orally bioavailable nucleoside analogue, has  
27 earlier been reported to exert antiviral activity against SARS-CoV2. We here report on the antiviral  
28 activity of Molnupiravir in a robust Syrian hamster SARS-CoV-2 infection model. Oral treatment of  
29 infected hamsters for four consecutive days, starting from the day of infection, markedly reduced (in  
30 a dose-dependent manner) viral loads in the lungs and improved the lung histopathology score. When  
31 onset of treatment with a high dose was delayed until 24h post-infection, a modest but still significant  
32 antiviral effect was observed at endpoint (96hr post-infection). When animals were treated with  
33 suboptimal doses of Molnupiravir and Favipiravir, another influenza drug with anti-coronavirus  
34 activity, a marked combined potency was observed with complete reduction ( $\sim 5 \log_{10}$ ) of infectious  
35 virus titers in the lungs of most of the combo-treated animals. Both drugs resulted in an increased  
36 mutation frequency of the viral RNA recovered from the lungs. In the combo-treated hamsters an  
37 increased frequency of C-to-T and G-to-A mutations as compared to the single treatment groups  
38 (including the highest dose of Molnupiravir) was observed which explains the pronounced antiviral  
39 potency of the combination. The combined all oral treatment and/or prophylaxis of SARS-CoV-2  
40 infections with the combination of Molnupiravir and Favipiravir should be explored in clinical studies.

41 **Keywords**

42 SARS-CoV-2; Antivirals; Molnupiravir; Favipiravir, hamsters, coronavirus

## 43 **Introduction**

44 The severe acute respiratory syndrome coronavirus 2 (SARS-CoV-2) is a  $\beta$ -coronavirus that was first  
45 identified in Wuhan, China in December 2019 (1). Since then, the virus rapidly spread around the globe  
46 with more than 109 million cases and 2.4 million deaths reported until February 2021  
47 [[www.covid19.who.int](http://www.covid19.who.int)]. Infection with SARS-CoV-2 results in coronavirus-induced disease (COVID-19)  
48 which is characterized by a wide range of symptoms including fever, dry cough, muscle and/or joint  
49 pain, headache, decreased sense of taste and smell and diarrhea. The disease can progress into severe  
50 complications such as acute respiratory distress syndrome (ARDS), respiratory failure, septic shock as  
51 well as multi-organ failure, which are mainly attributed to a massive cytokine storm and exaggerated  
52 immune response (2).

53 To date, there are no approved, selective coronavirus antivirals to treat or prevent infections. The use  
54 of potent antivirals against SARS-CoV-2 will reduce viral loads and may hence reduce the chance to  
55 progress to a severe disease. In addition, such antiviral drugs may be useful to protect for example  
56 health care workers and high-risk groups in a prophylactic setting. Since the *de novo* development and  
57 approval of (a) specific, highly potent antiviral(s) for SARS-CoV-2 may require years, the main focus for  
58 COVID-19 treatment in the current pandemic is to repurpose drugs that have been approved or in  
59 clinical trials for other diseases (3).

60 The ribonucleoside analogue, N4-hydroxycytidine (NHC, EIDD-1931), was initially developed as an  
61 influenza inhibitor, but exerts also broader-spectrum antiviral activity against multiple viruses  
62 belonging to different families of RNA viruses. Activity against SARS-CoV and SARS-CoV-2 has been  
63 reported in cell lines and primary human airway epithelial cell cultures (4). Acting through lethal  
64 mutagenesis, its incorporation into viral RNA results in the accumulation of deleterious transition  
65 mutations beyond a permissible error threshold to sustain the virus population, leading to error  
66 catastrophe (5). The orally bioavailable, pro-drug counterpart of NHC (6), Molnupiravir (EIDD-2801,  
67 MK-4482) is currently being assessed for its potential as an antiviral treatment of SARS-CoV-2 infection

68 in Phase 2 clinical trials of infected patients (NCT04405570, NCT04405739). To our knowledge, three  
69 recent studies reported on the activity of orally dosed EIDD-2801 in SARS-CoV-2-infected animals. Oral  
70 treatment of SARS-CoV-2 infected Syrian hamsters with high doses of Molnupiravir (EIDD-2801) was  
71 reported to result in marked reduction (1 to 2  $\log_{10}$ ) of viral loads when administered either in a pre-  
72 exposure (12h before infection) or post-exposure (start of treatment 12h post-infection, pi) settings  
73 (7). In a ferret model infection model, Molnupiravir (EIDD-2801) was reported to significantly reduce  
74 virus loads in the lungs when start of treatment was delayed until 12 or 36h pi and to block also SARS-  
75 CoV-2 contact transmission (8). In a humanized mouse model i.e. implanted with human lung tissues,  
76 Molnupiravir (EIDD-2801) prevented SARS-CoV-2 infection in a pre-exposure prophylaxis setting (9).

77 We recently demonstrated that the influenza drug Favipiravir results in a pronounced antiviral activity  
78 in SARS-CoV-2-infected hamsters, whereas hydroxychloroquine lacks antiviral activity in this model  
79 (10). Here, we use the same hamster model to obtain further information on the antiviral activity of  
80 Molnupiravir (EIDD-2801) either when used alone or in combination with Favipiravir and on the  
81 mechanism of the combined treatment.

## 82 **Results**

### 83 ***In vivo* efficacy of Molnupiravir against SARS-CoV-2 at the time of infection**

84 First, we evaluated the (dose-response) effect of Molnupiravir (EIDD-2801) in SARS-CoV-2-infected  
85 hamsters. Briefly, 6-8 weeks female SG hamsters were treated orally with Molnupiravir (either 75, 150,  
86 200 or 500 mg/kg, BID) or the vehicle (i.e. the control group) for four consecutive days starting one  
87 hour before intranasal infection with SARS-CoV-2 [BetaCov/Belgium/GHB-03021/2020 (EPI ISL 109  
88 407976|2020-02-03)]. At day four post-infection (pi), the animals were euthanized and lungs were  
89 collected for quantification of viral RNA, infectious virus titers and lung histopathology as described  
90 previously (10) (Fig. 1A). Molnupiravir treatment resulted in a dose-dependent reduction in the viral  
91 RNA copies per mg of lung tissue with 1.3 ( $P=0.002$ ), 1.9 ( $P<0.0001$ ), 3.3 ( $P<0.0001$ ) and 2.8 ( $P=0.01$ )  
92  $\log_{10}$  reduction was noted in the groups that had been treated BID with 75, 150, 200 and 500 mg/kg,

93 respectively (Fig. 1B). A similar pattern was observed for the infectious virus load in the lungs whereas  
94 the high doses, but not the 75 mg/kg dose BID, significantly reduced infectious virus lung titers (Fig.  
95 1C). The reduction in infectious virus titers (TCID<sub>50</sub> / mg tissue) in the lungs of hamsters treated BID  
96 with 150, 200 and 500 mg/kg was 1.3 (P=0.0002), 3.5 (P<0.0001) and 1 (P=0.0002) log<sub>10</sub>, respectively  
97 (Fig. 1C). However, some variations in viral loads reduction was observed in the group treated with the  
98 highest dose.

99 Treatment with 75, 150 and 200 mg/kg Molnupiravir BID significantly reduced the histological lung  
100 disease score (P=0.0025, P=0.005, P<0.0001, respectively), because of a large variation of the individual  
101 data points surprisingly no significant protective activity was noted at the highest dose used (Fig. 1D).  
102 All the doses studied were well tolerated without significant weight loss or any obvious adverse effects  
103 (Fig. 1E).

#### 104 ***In vivo* efficacy of Molnupiravir against SARS-CoV-2 in a post-exposure setting**

105 We next explored whether delayed Molnupiravir (EIDD-2801) treatment [started at 24 h after  
106 infection] (Fig. 2A) has an impact on the infection. Delaying the start of treatment with Molnupiravir  
107 (200 mg/kg or 500 mg/kg BID) by 1 day resulted in 0.4 (P=0.03) and 1 (P=0.05, ns) log<sub>10</sub> reduction of  
108 viral RNA copies/mg lung, respectively (Fig. 2B). Likewise no substantial reduction of infectious virus  
109 load in the 200 mg/kg Day 1 group was noted, whereas a modest but significant reduction [1 log<sub>10</sub>  
110 reduction in TCID<sub>50</sub>/mg lung tissue (P=0.0003)] in the 500 mg/kg Day 1 group was observed (Fig. 2C).  
111 A modest reduction of the histological lung disease score was observed in the 200 mg/kg (P=0.0007)  
112 and 500 mg/kg (P=0.27, ns) Day 1 treatment groups (Fig. 2D). Thus even though the delayed start of  
113 treatment with EIDD-2801 is not sufficient to efficiently stop viral replication as assessed 72h later, the  
114 drug may still able to delay to some extend disease progression.

#### 115 **The combined treatment of Molnupiravir and Favipiravir results in a marked potentiation of efficacy.**

116 We earlier demonstrated that a high dose of Favipiravir (i.e. 500 mg/kg, BID) can reduce infectious  
117 virus loads of SARS-CoV2 in the lungs of hamsters to undetectable levels. We here explored whether a

118 similar potency can be achieved by combined treatment of infected hamsters with suboptimal doses  
119 of Favipiravir and Molnupiravir (EIDD-2801) (Fig. 3A). A single treatment with Favipiravir (300 mg/kg,  
120 BID, intraperitoneal injection) reduced viral RNA and infectious virus loads in the lungs of infected  
121 hamsters by 0.7 ( $P=0.0009$ ) and 1.2 ( $P=0.0002$ )  $\log_{10}$ /mg tissue, respectively (Fig. 3B/C). The  
122 combination resulted in enhanced antiviral efficacy with a reduction of 2.7  $\log_{10}$  viral RNA per mg lung  
123 tissue (Fig. 3B), but interestingly, in a markedly enhanced reduction in infectious virus titers (4.5  $\log_{10}$   
124 TCID<sub>50</sub> per mg lung,  $P=0.02$  as compared to Molnupiravir alone) (Fig. 3C). Notably, six out of ten  
125 hamsters in the combined treatment group had no detectable infectious virus in their lungs (Fig. 3C).  
126 A marked improvement in the histological lung pathology scores was also observed in the combined  
127 treatment group (Fig. 3D). No significant weight loss or toxicity signs were observed in the combined  
128 treatment group (Supplementary Fig. S1).

129 Molnupiravir is known to increase the mutation frequency of MERS-CoV viral RNA in infected mice (4).  
130 To test whether this is also the case in SARS-CoV-2-infected hamsters, we used Illumina deep  
131 sequencing to determine the SARS-CoV-2 mutations rate in remaining viral RNA in lung samples of  
132 hamsters after treatment. A dose-dependent increase in the mutation count (in particular, C-to-T and  
133 G-to-A transitions) in samples from EIDD-2801 treated hamsters was observed as compared to the  
134 vehicle control group (Supplementary Fig. S2). The Molnupiravir (150mg/kg) + Favipiravir (300 mg/kg)  
135 combination resulted in a markedly higher number of C-to-T and G-to-A mutations (68 and 50,  
136 respectively), as compared to the single dose groups [150 mg/kg Molnupiravir group (33 and 31,  
137 respectively) and 300 mg/kg Favipiravir (14 and 21, respectively)] (Fig. 3E). The C-to-T and G-to-A  
138 mutation count in the combination group was also markedly higher than in the highest dose group of  
139 Molnupiravir (47 and 32, respectively) (Supplementary Fig. S2). These results may at least partially  
140 explain the markedly enhanced reduction in infectious viral loads observed in the combination  
141 treatment group.

142

143 **Discussion**

144 We demonstrate in the robust SARS-CoV2 hamster infection model (10, 11) that Molnupiravir  
145 markedly reduces, albeit at a relatively high dose, SARS-CoV-2 infection and virus induced pathology.  
146 In another study (7) a somewhat higher dose (250 mg/kg) was less effective (1 log<sub>10</sub> reduction in viral  
147 RNA and 2 log<sub>10</sub> reduction in infectious virus titers) despite the fact that a much lower inoculum was  
148 used for challenge than is the case in our study. At high doses, the drug was also reported to be  
149 effective in SARS-CoV-infected C57/BL6 mice either when administered prophylactically or when  
150 treatment was delayed until 48 hr after infection (4). In a humanized mouse model of SARS-CoV-2  
151 infection, high dose prophylaxis resulted in a ~6 log<sub>10</sub> reduction in viral lung titres (9). The drug proved  
152 also effective at relatively low doses (15 mg/kg, BID) to inhibit viral replication in the upper respiratory  
153 tract of ferrets even when start of treatment was delayed until 36 hpi. It also prevented contact  
154 transmission when only index animals were treated (8). Our data on the monotherapy of infected  
155 hamsters lend further support to these studies.

156 The antiviral drug, Remdesivir (Veklury), is the first drug to receive FDA approval for use in hospitalised  
157 COVID19 patients, although the World Health Organisation has recently recommended against its use.  
158 Remdesivir needs to be administered intravenously which precludes its use in the early stages of the  
159 infection/disease or even prophylactic use. On the other hand, Molnupiravir can be dosed via the oral  
160 route. Both drugs have a high barrier to resistance and resistant variants have a loss in fitness (6, 11).  
161 Favipiravir is another broad-spectrum antiviral drug that can be dosed orally. It is currently being  
162 studied in clinical trials against SARS-CoV-2 in several countries (12). Akin to Molnupiravir (5, 11) also  
163 Favipiravir induces lethal viral mutagenesis (13). We previously showed that treatment of SARS-CoV-  
164 2-infected hamsters with a high doses of Favipiravir can reduce infectious SARS-CoV2 titers in the lungs  
165 of infected hamsters to undetectable levels and results as a consequence in a markedly improved lung  
166 pathology (10).

167 We here demonstrate that the combination of suboptimal doses of Molnupiravir (150 mg/kg, BID) and  
168 Favipiravir (300 mg/kg, BID) results in a marked antiviral in the hamster model. Infectious virus titers  
169 were reduced to undetectable in 6 out of 10 treated animals. A median reduction of 4.5 log<sub>10</sub> TCID<sub>50</sub>/mg  
170 lung tissue was achieved, which is much more pronounced than what could be expected from an  
171 additive activity of either Molnupiravir (1.3 log<sub>10</sub>) or Favipiravir (1.1 log<sub>10</sub>) when dosed alone. This  
172 pronounced efficacy of the combination Favipiravir may at least to some extent be explained by the  
173 markedly increased total mutation count in the viral RNA collected from the lungs of combo-treated  
174 hamsters as compared to the single treatment groups.

175 In conclusion our data lend further support for the development of Molnupiravir as an antiviral drug  
176 for the prophylaxis/treatment of SARS-CoV2 infections. The more than additive activity of the  
177 combination of Molnupiravir and Favipiravir is also reflected in an enhanced accumulation of  
178 mutations in the viral genome in animals that received both drugs. Our findings lay the basis for the  
179 design of clinical studies to test the efficacy of the combination of Molnupiravir and Favipiravir, both  
180 of which can be dosed orally.

181



## 182 **Materials and methods**

### 183 **SARS-CoV-2**

184 The SARS-CoV-2 strain used in this study, BetaCov/Belgium/GHB-03021/2020 (EPI ISL 109  
185 407976|2020-02-03), was recovered from a nasopharyngeal swab taken from an RT-qPCR confirmed  
186 asymptomatic patient who returned from Wuhan, China in the beginning of February 2020. A close  
187 relation with the prototypic Wuhan-Hu-1 2019-nCoV (GenBank accession 112 number MN908947.3)  
188 strain was confirmed by phylogenetic analysis. Infectious virus was isolated by serial passaging on  
189 HuH7 and Vero E6 cells (10); passage 6 virus was used for the study described here. The titer of the  
190 virus stock was determined by end-point dilution on Vero E6 cells by the Reed and Muench method  
191 (14). Live virus-related work was conducted in the high-containment A3 and BSL3+ facilities of the KU  
192 Leuven Rega Institute (3CAPS) under licenses AMV 30112018 SBB 219 2018 0892 and AMV 23102017  
193 SBB 219 20170589 according to institutional guidelines.

### 194 **Cells**

195 Vero E6 cells (African green monkey kidney, ATCC CRL-1586) were cultured in minimal essential  
196 medium (Gibco) supplemented with 10% fetal bovine serum (Integro), 1% L- glutamine (Gibco) and 1%  
197 bicarbonate (Gibco). End-point titrations were performed with medium containing 2% fetal bovine  
198 serum instead of 10%.

### 199 **Compounds**

200 For the first pilot experiment, EIDD-2801 was kindly provided by Calibr at Scripps Research (USA). For  
201 further studies, Molnupiravir (EIDD-2801) was purchased from Excenen Pharmatech Co., Ltd (China)  
202 and was formulated as 50 or 100 mg/ml (for groups with the highest dose) stocks in a vehicle  
203 containing 10%PEG400 and 2.5% Kolliphor-EL in water. Favipiravir was purchased from BOC Sciences  
204 (USA) and was formulated as a 50 mg/mL stock in 3% sodium bicarbonate.

### 205 **SARS-CoV-2 infection model in hamsters**

206 The hamster infection model of SARS-CoV-2 has been described before (10, 15). In brief, wild-type  
207 Syrian Golden hamsters (*Mesocricetus auratus*) were purchased from Janvier Laboratories and were  
208 housed per two in ventilated isolator cages (IsoCage N Biocontainment System, Tecniplast) with ad  
209 libitum access to food and water and cage enrichment (wood block). The animals were acclimated for  
210 4 days prior to study start. Housing conditions and experimental procedures were approved by the  
211 ethics committee of animal experimentation of KU Leuven (license P065-2020). Female hamsters of 6-  
212 8 weeks old were anesthetized with ketamine/xylazine/atropine and inoculated intranasally with 50  
213  $\mu\text{L}$  containing  $2 \times 10^6$  TCID<sub>50</sub> SARS-CoV-2 (day 0).

#### 214 **Treatment regimen**

215 For D0 treatment, animals were treated twice daily with 75, 150, 200 or 500 mg/kg of EIDD-2801 by  
216 oral gavage just before infection with SARS-CoV-2. For delayed treatment groups, animals were treated  
217 with either, 200 or 500 mg/kg of EIDD-2801 starting from day1 post-infection (pi) by oral gavage. For  
218 combination therapy, hamsters were treated from day0 with 150 mg/kg EIDD-2801 (oral gavage) and  
219 300 mg/kg Favipiravir (intraperitoneal, i.p.) twice daily. All the treatments continued until day 3 pi.  
220 Hamsters were monitored for appearance, behavior and weight. At day 4 pi, hamsters were euthanized  
221 by i.p. injection of 500  $\mu\text{L}$  Dolethal (200mg/mL sodium pentobarbital, Vétquinol SA). Lungs were  
222 collected and viral RNA and infectious virus were quantified by RT-qPCR and end-point virus titration,  
223 respectively.

#### 224 **SARS-CoV-2 RT-qPCR**

225 Hamster lung tissues were collected after sacrifice and were homogenized using bead disruption  
226 (Precellys) in 350  $\mu\text{L}$  TRK lysis buffer (E.Z.N.A.® Total RNA Kit, Omega Bio-tek) and centrifuged (10.000  
227 rpm, 5 min) to pellet the cell debris. RNA was extracted according to the manufacturer's instructions.  
228 Of 50  $\mu\text{L}$  eluate, 4  $\mu\text{L}$  was used as a template in RT-qPCR reactions. RT-qPCR was performed on a  
229 LightCycler96 platform (Roche) using the iTaq Universal Probes One-Step RT-qPCR kit (BioRad) with N2

230 primers and probes targeting the nucleocapsid (10). Standards of SARS-CoV-2 cDNA (IDT) were used  
231 to express viral genome copies per mg tissue.

### 232 **End-point virus titrations**

233 Lung tissues were homogenized using bead disruption (Prcellys) in 350  $\mu$ L minimal essential medium  
234 and centrifuged (10,000 rpm, 5min, 4°C) to pellet the cell debris. To quantify infectious SARS-CoV-2  
235 particles, endpoint titrations were performed on confluent Vero E6 cells in 96- well plates. Viral titers  
236 were calculated by the Reed and Muench method (14) using the Lindenbach calculator and were  
237 expressed as 50% tissue culture infectious dose (TCID50) per mg tissue.

### 238 **Histology**

239 For histological examination, the lungs were fixed overnight in 4% formaldehyde and embedded in  
240 paraffin. Tissue sections (5  $\mu$ m) were analyzed after staining with hematoxylin and eosin and scored  
241 blindly for lung damage by an expert pathologist. The scored parameters, to which a cumulative score  
242 of 1 to 3 was attributed, were the following: congestion, intra-alveolar hemorrhagic, apoptotic bodies  
243 in bronchus wall, necrotizing bronchiolitis, perivascular edema, bronchopneumonia, perivascular  
244 inflammation, peribronchial inflammation and vasculitis.

### 245 **Deep sequencing and analysis of whole genome sequences**

246 Genomic sequences from all samples were obtained using SureSelect<sup>XT</sup> target enrichment and Illumina  
247 sequencing. Reads generated were trimmed with Trim Galore  
248 (<https://github.com/FelixKrueger/TrimGalore>). Duplicated reads were removed using Picard  
249 (<http://broadinstitute.github.io/picard>). Reads from the inoculation sample were mapped to the SARS-  
250 CoV-2 reference genome (NC\_045512) from GenBank using BWA-MEM (16). The mapping quality was  
251 checked using Qualimap and the consensus whole genome sequence was generated using QUASR  
252 (17, 18). Reads from the lung samples were mapped to this unique reference sequence. Genomes with  
253 less than less than a 100 read depth were excluded. Variants above 1% and with a minimum of 2  
254 supporting reads per strand were identified at sites with a read depth of  $\geq 10$  using VarScan (19).

255 **Statistics**

256 GraphPad Prism (GraphPad Software, Inc.) was used to perform statistical analysis. Statistical  
257 significance was determined using the non-parametric Mann Whitney U-test. P-values of  $\leq 0.05$  were  
258 considered significant.

259

260 **Acknowledgments**

261 We thank Carolien De Keyzer, Lindsey Bervoets, Thibault Francken, Elke Maas, Jasper Rymenants, Birgit  
262 Voeten, Dagmar Buyst, Niels Cremers, Bo Corbeels and Kathleen Van den Eynde for excellent technical  
263 assistance. We are grateful to Piet Maes for kindly providing the SARS-CoV-2 strain used in this study.  
264 We thank Prof. Jef Arnout and Dr. Annelies Sterckx (KU Leuven Faculty of Medicine, Biomedical  
265 Sciences Group Management) and Animalia and Biosafety Departments of KU Leuven for facilitating  
266 the animal studies. This project has received funding from the Covid-19-Fund KU Leuven/UZ Leuven  
267 and the COVID-19 call of FWO (G0G4820N), the European Union's Horizon 2020 research and  
268 innovation program under grant agreements No 101003627 (SCORE project) and Bill & Melinda Gates  
269 Foundation (BGMF) under grant agreement INV-00636. Sequencing was performed by the Pathogen  
270 Genomics Unit at UCL. R.A., C.S.F. and L.L. were supported by a KU Leuven internal project fund. X.Z.  
271 received funding of the China Scholarship Council (grant No.201906170033). J.B. receives funding from  
272 the NIHR UCL/UCLH Biomedical Research Centre. J.P. is funded by the Rosetrees Trust.

273 **Competing Interest Statement:** None to declare.

274

275 **References**

- 276 1. N. Zhu, *et al.*, A Novel Coronavirus from Patients with Pneumonia in China, 2019. *N. Engl. J.*  
277 *Med.* **382**, 727–733 (2020).
- 278 2. M. Z. Tay, C. M. Poh, L. Rénia, P. A. MacAry, L. F. P. Ng, The trinity of COVID-19: immunity,  
279 inflammation and intervention. *Nat. Rev. Immunol.* **20**, 363–374 (2020).
- 280 3. L. Delang, J. Neyts, Medical treatment options for COVID-19. *Eur. Hear. J. Acute Cardiovasc.*  
281 *Care*, 204887262092279 (2020).
- 282 4. T. P. Sheahan, *et al.*, An orally bioavailable broad-spectrum antiviral inhibits SARS-CoV-2 in  
283 human airway epithelial cell cultures and multiple coronaviruses in mice. *Sci. Transl. Med.* **12**  
284 (2020).
- 285 5. N. Urakova, *et al.*,  $\beta$ -D- N 4 -Hydroxycytidine Is a Potent Anti-alphavirus Compound That  
286 Induces a High Level of Mutations in the Viral Genome . *J. Virol.* **92** (2017).
- 287 6. M. Toots, *et al.*, Characterization of orally efficacious influenza drug with high resistance  
288 barrier in ferrets and human airway epithelia. *Sci. Transl. Med.* **11** (2019).
- 289 7. K. Rosenke, *et al.*, Orally delivered MK-4482 inhibits SARS-CoV-2 replication in the Syrian  
290 hamster model. *Res. Sq.* (2020).
- 291 8. R. M. Cox, J. D. Wolf, R. K. Plemper, Therapeutically administered ribonucleoside analogue  
292 MK-4482/EIDD-2801 blocks SARS-CoV-2 transmission in ferrets. *Nat. Microbiol.* (2020).
- 293 9. A. Wahl, *et al.*, Acute SARS-CoV-2 Infection is Highly Cytopathic, Elicits a Robust Innate  
294 Immune Response and is Efficiently Prevented by EIDD-2801. *Res. Sq.* (2020).
- 295 10. S. J. F. Kaptein, *et al.*, Favipiravir at high doses has potent antiviral activity in SARS-CoV-  
296 2–infected hamsters, whereas hydroxychloroquine lacks activity. *Proc. Natl. Acad. Sci. U. S. A.*  
297 **117**, 26955–26965 (2020).

- 298 11. M. L. Agostini, *et al.*, Coronavirus susceptibility to the antiviral remdesivir (GS-5734) is  
299 mediated by the viral polymerase and the proofreading exoribonuclease. *MBio* **9** (2018).
- 300 12. Y. X. Du, X. P. Chen, Favipiravir: Pharmacokinetics and Concerns About Clinical Trials for 2019-  
301 nCoV Infection. *Clin. Pharmacol. Ther.* **108**, 242–247 (2020).
- 302 13. L. Delang, R. Abdelnabi, J. Neyts, Favipiravir as a potential countermeasure against neglected  
303 and emerging RNA viruses. *Antiviral Res.* **153**, 85–94 (2018).
- 304 14. L. J. Reed, H. Muench, A simple method of estimating fifty percent endpoints. *Am. J. Hyg.* **27**,  
305 493–497 (1938).
- 306 15. R. Boudewijns, *et al.*, STAT2 signaling restricts viral dissemination but drives severe  
307 pneumonia in SARS-CoV-2 infected hamsters. *Nat. Commun.* **11**, 5838 (2020).
- 308 16. H. Li, R. Durbin, Fast and accurate short read alignment with Burrows-Wheeler transform.  
309 *Bioinformatics* **25**, 1754–1760 (2009).
- 310 17. K. Okonechnikov, A. Conesa, F. García-Alcalde, Qualimap 2: Advanced multi-sample quality  
311 control for high-throughput sequencing data. *Bioinformatics* **32**, 292–294 (2016).
- 312 18. S. J. Watson, *et al.*, Viral population analysis and minority-variant detection using short read  
313 next-generation sequencing. *Philos. Trans. R. Soc. B Biol. Sci.* **368** (2013).
- 314 19. D. C. Koboldt, *et al.*, VarScan 2: Somatic mutation and copy number alteration discovery in  
315 cancer by exome sequencing. *Genome Res.* **22**, 568–576 (2012).

316

317

318

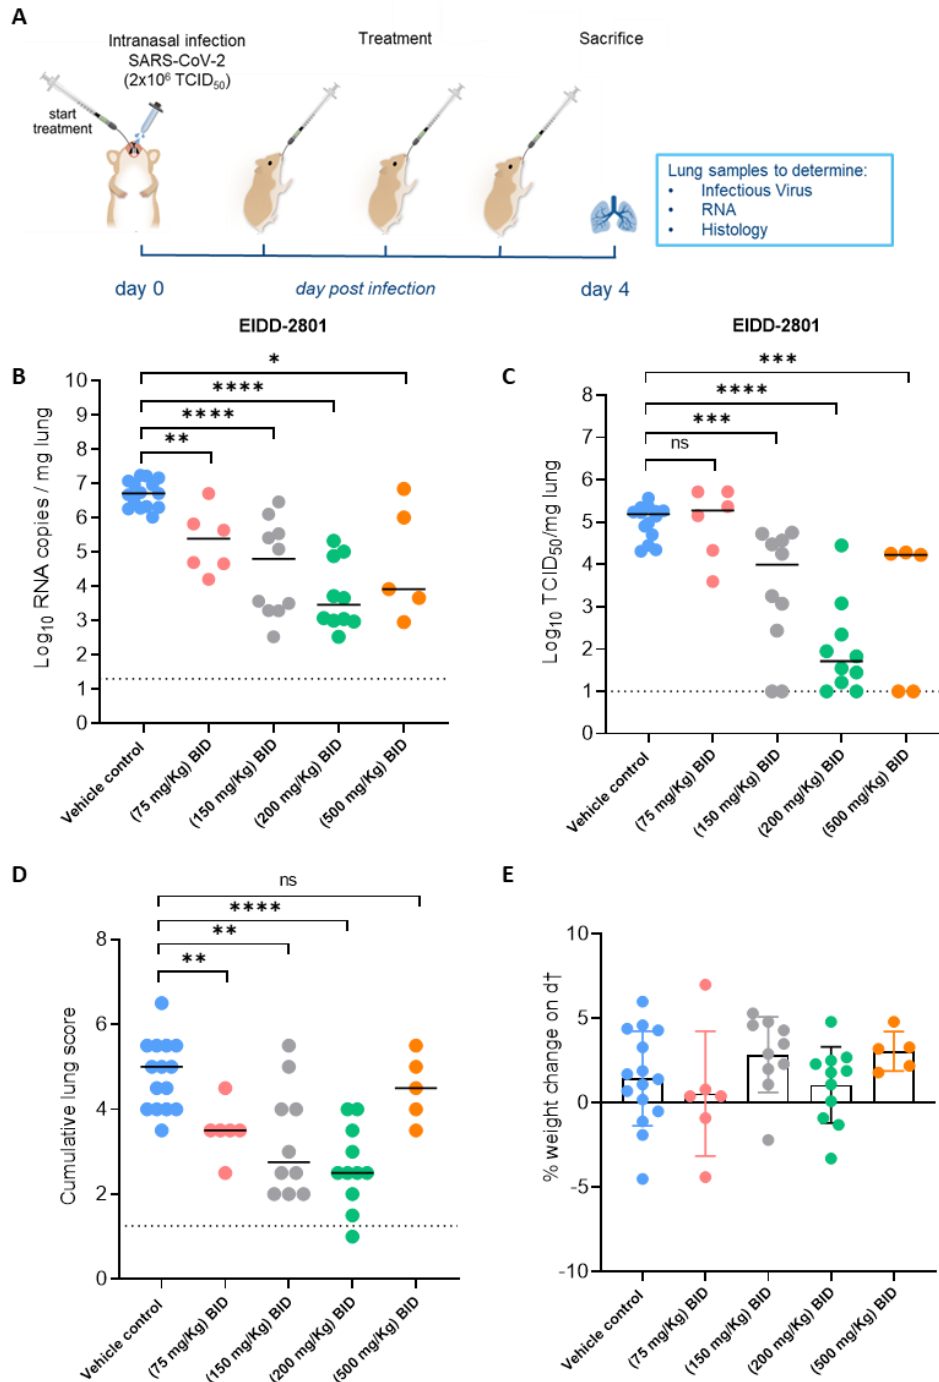

319

320 **Fig.1. Efficacy of Molnupiravir (EIDD-2801) against SARS-CoV-2 in a hamster infection model.** (A) Set-up of the  
 321 study. (B) Viral RNA levels in the lungs of control (vehicle-treated) and EIDD-2801-treated (75, 150, 200 or 500  
 322 mg/kg, BID) SARS-CoV-2-infected hamsters at day 4 post-infection (pi) are expressed as log<sub>10</sub> SARS-CoV-2 RNA  
 323 copies per mg lung tissue. Individual data and median values are presented. (C) Infectious viral loads in the lungs  
 324 of control (vehicle-treated) and EIDD-2801-treated SARS-CoV-2-infected hamsters at day 4 pi are expressed as  
 325 log<sub>10</sub> TCID<sub>50</sub> per mg lung tissue. Individual data and median values are presented. (D) Cumulative severity score  
 326 from H&E stained slides of lungs from control (vehicle-treated) and EIDD-2801-treated SARS-CoV-2-infected  
 327 hamsters. Individual data and median values are presented and the dotted line represents the median score of  
 328 untreated non-infected hamsters. (E) Weight change at day 4 pi in percentage, normalized to the body weight at  
 329 the time of infection. Bars represent means  $\pm$  SD. Data were analyzed with the Mann-Whitney U test. \*P < 0.05,  
 330 \*\*P < 0.01, \*\*\*P < 0.001, \*\*\*\*P < 0.0001, ns=non-significant. All data (panels B, C, D, E) are from two independent  
 331 experiments except for the 75 and 500 mg/kg groups. The number of animals were 15, 6, 10, 10, 5 for respectively  
 332 the vehicle 75, 150, 200 and 500 mg/kg condition.



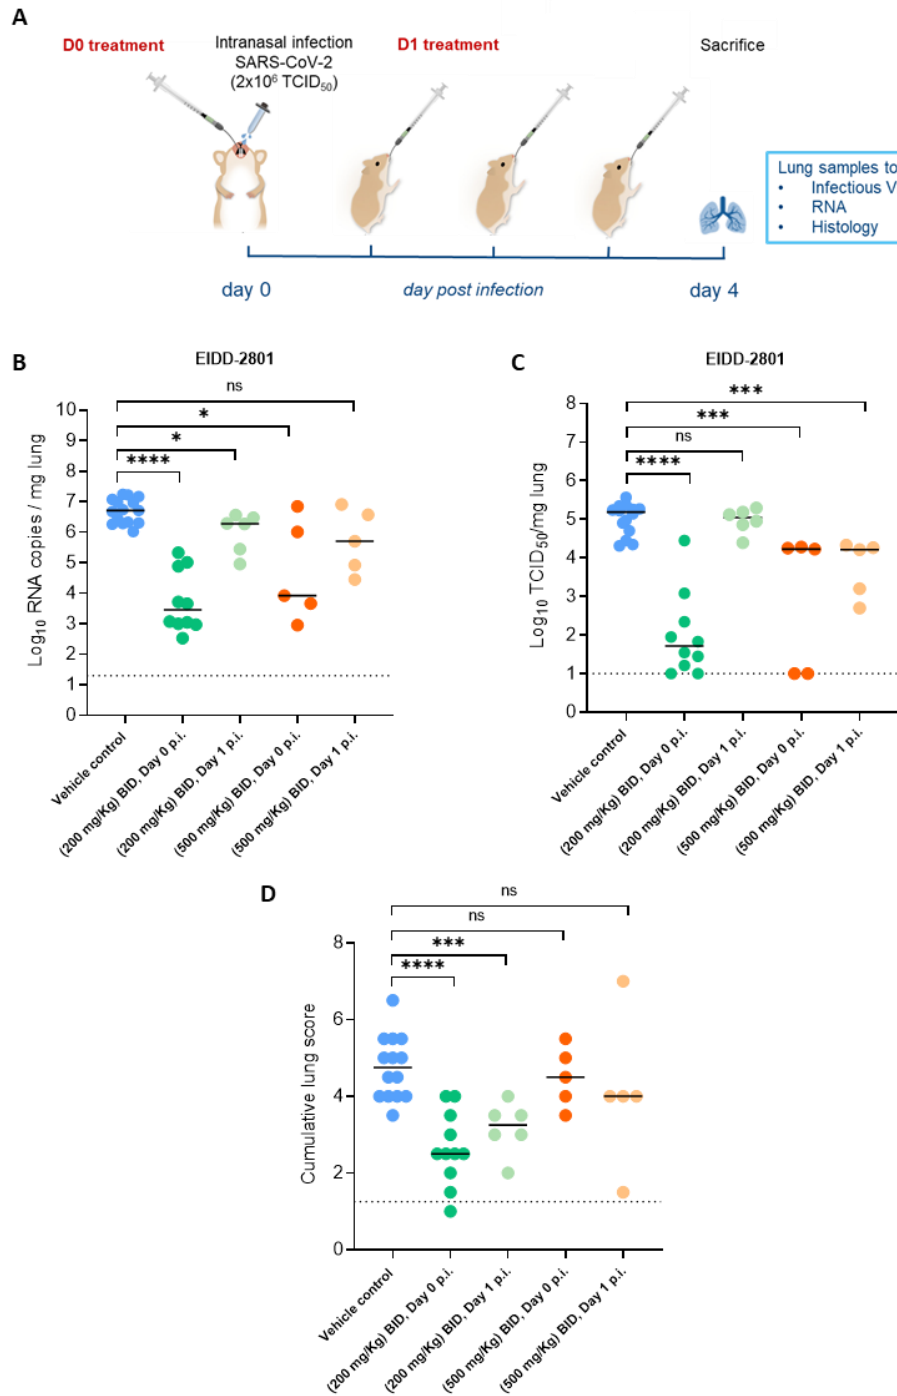

333

334 **Fig.2. Effect of Molnupiravir (EIDD-2801) against SARS-CoV-2 in a hamster infection model in a post-exposure**  
 335 **setting.** (A) Set-up of the study. (B) Viral RNA levels in the lungs of control (vehicle-treated) and EIDD-2801-  
 336 treated (200 or 500 mg/kg, BID starting from day 0 or day 1 post-infection, p.i.) SARS-CoV-2-infected hamsters  
 337 at day 4 post-infection (pi) are expressed as log<sub>10</sub> SARS-CoV-2 RNA copies per mg lung tissue. Individual data and  
 338 median values are presented. (C) Infectious viral loads in the lungs of control (vehicle-treated) and EIDD-2801-  
 339 treated SARS-CoV-2-infected hamsters at day 4 pi are expressed as log<sub>10</sub> TCID<sub>50</sub> per mg lung tissue. Individual  
 340 data and median values are presented. (D) Cumulative severity score from H&E stained slides of lungs from  
 341 control (vehicle-treated) and EIDD-2801-treated SARS-CoV-2-infected hamsters. Individual data and median  
 342 values are presented and the dotted line represents the median score of untreated non-infected hamsters. Data  
 343 were analyzed with the Mann-Whitney U test. \*P < 0.05, \*\*\*P < 0.001, \*\*\*\*P < 0.0001, ns=non-significant. Data  
 344 for the vehicle and 200 mg/kg day 0 p.i. groups are from respectively 15 and 10 animals and two independent  
 345 experiments. Data from the 200 mg/kg day 1 p.i, 500 mg/kg day 0 p.i and 500 mg/kg day1 p.i. condition are from  
 346 a single experiment with respectively 6, 5 and 5 animals.

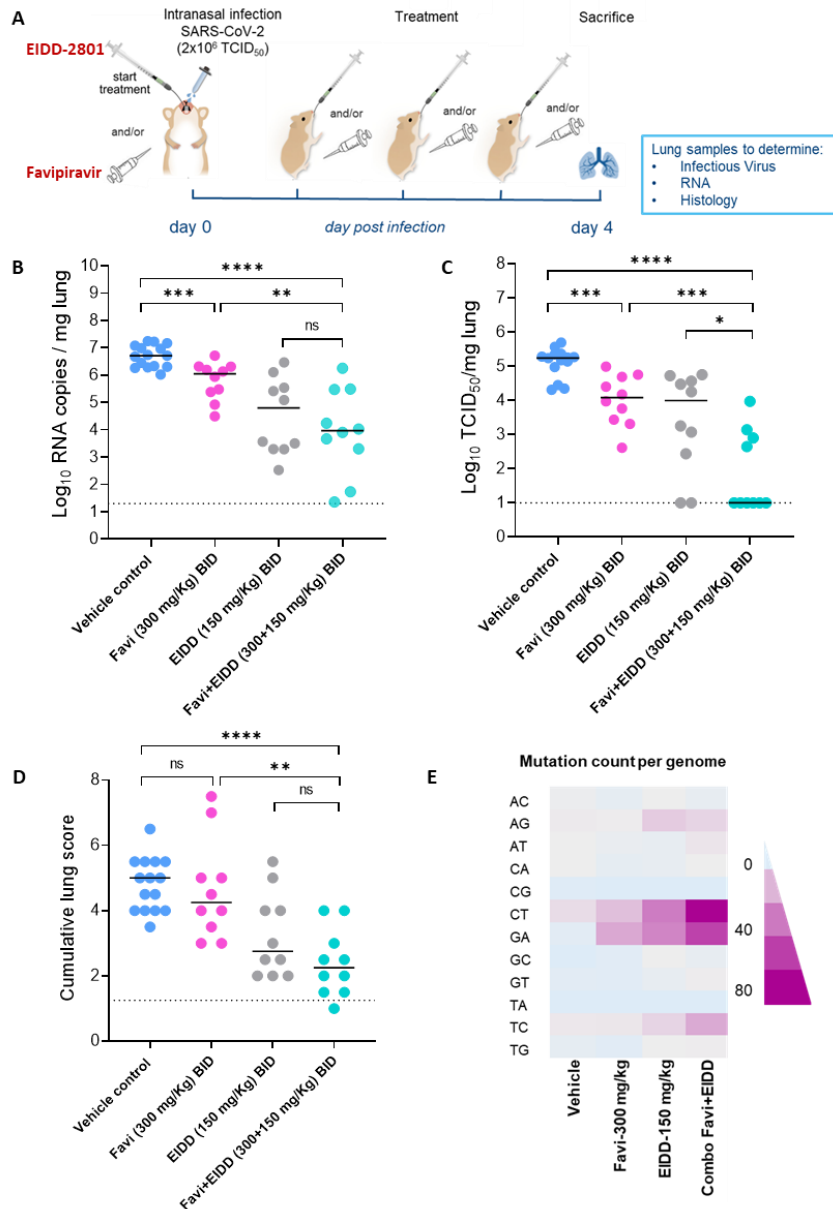

347

348 **Fig.3. Combined efficacy of Favipiravir and Molnupiravir (EIDD-2801) against SARS-CoV-2 in a hamster infection**  
 349 **model.** (A) Set-up of the study. (B) Viral RNA levels in the lungs of control (vehicle-treated), Favipiravir-treated  
 350 (300 mg/kg, BID), EIDD-2801-treated (150 mg/kg, BID) and combination-treated (Favipiravir+EIDD-2801 at  
 351 300+150 mg/kg, BID, respectively) SARS-CoV-2-infected hamsters at day 4 post-infection (pi) are expressed as  
 352 log<sub>10</sub> SARS-CoV-2 RNA copies per mg lung tissue. Individual data and median values are presented. (C) Infectious  
 353 viral loads in the lungs of control (vehicle-treated), Favipiravir-treated, EIDD-2801-treated and combination-  
 354 treated (Favipiravir+EIDD-2801) SARS-CoV-2-infected hamsters at day 4 pi are expressed as log<sub>10</sub> TCID<sub>50</sub> per mg  
 355 lung tissue. Individual data and median values are presented. (D) Cumulative severity score from H&E stained  
 356 slides of lungs from control (vehicle-treated), Favipiravir-treated, EIDD-2801-treated and combination-treated  
 357 (Favipiravir+EIDD-2801) SARS-CoV-2-infected hamsters. Individual data and median values are presented and  
 358 the dotted line represents the median score of untreated non-infected hamsters. (E) Mean mutation count (per  
 359 the whole genome) in the viral RNA isolated from the lungs of control (vehicle-treated), Favipiravir-treated (300  
 360 mg/kg, BID), EIDD-2801-treated (150 mg/kg, BID) and combination-treated (Favipiravir+EIDD-2801 at 300+150  
 361 mg/kg, BID, respectively) SARS-CoV-2-infected hamsters at day 4 post-infection (pi). Data were analyzed with  
 362 the Mann-Whitney U test. \*P < 0.05, \*\*P < 0.01, \*\*\*P < 0.001, \*\*\*\*P < 0.0001, ns=non-significant.  
 363 Favipiravir, EIDD=EIDD-2801. All data (panels B, C, D) are from two independent experiments with 15, 10,  
 364 10, 10 animals for respectively the vehicle, Favipiravir 300 mg/kg, EIDD-2801 150 mg/kg and Favipiravir+EIDD-  
 365 2801 condition.

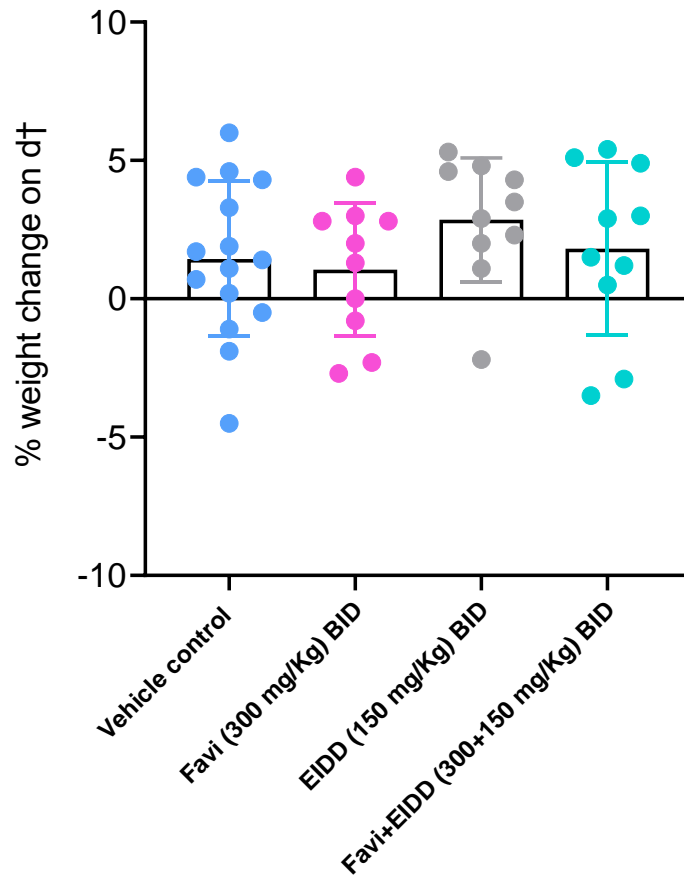

366

367 **Fig. S1. Tolerability of combined treatment with Favipiravir and EIDD-2801 in SARS-CoV-2-infected hamsters.**

368 Weight change at day 4 post-infection in percentage, normalized to the body weight at the time of infection.

369 Bars represent means  $\pm$  SD.

370

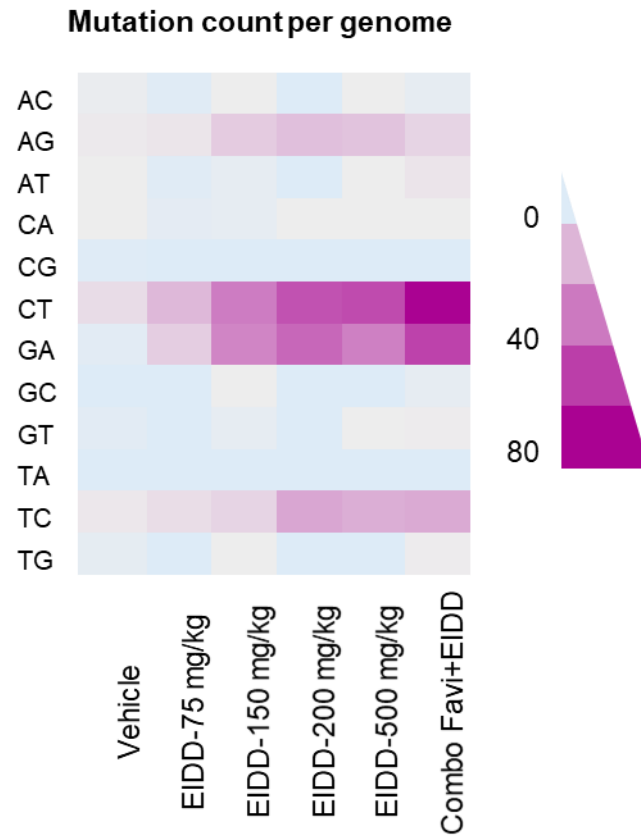

371

372 **Fig. S2. Dose-dependent increase in mutation count in SARS-CoV-2 viral RNA by Molnupiravir (EIDD-2801).**  
373 Mean mutation count (per the whole genome) in the viral RNA isolated from the lungs of control (vehicle-  
374 treated), EIDD-2801-treated (75, 150, 200 or 500 mg/kg, BID) and combination-treated (Favipiravir+EIDD-2801  
375 at 300+150 mg/kg, BID, respectively) SARS-CoV-2-infected hamsters at day 4 post-infection (pi).

376

377

378
